# Supplementary material for: Efficient Decolorization of Azo Dye Orange II in a UV-Fe3+-PMS-Oxalate System
Source: MDPI journal article supplement (doi:10.3390/pr11030903), 2023-03-16
Supplement: s1 [file s1]

## Supplementary Materials

For

# Efficient decolorization of the azo dye Orange II in a UV-Fe<sup>3+</sup>-PMS-oxalate system

Yajie Wang <sup>1</sup>, Xin Dong <sup>1</sup>, Chengfeng, Liu <sup>1</sup>, Peng Cheng <sup>2</sup>, and Gilles Mailhot <sup>2,\*</sup>

<sup>1</sup> School of Eco-Environmental Engineering, Guizhou Minzu University, Guiyang 550025, China

<sup>2</sup> Université Clermont Auvergne, CNRS, Clermont Auvergne INP, Institut de Chimie de Clermont Ferrand (ICCF) UMR 6296, BP 80026, F-63171, Aubière cedex, France

\* Correspondence: gilles.mailhot@uca.fr

## Contents

---

**Figure S1:** The absorption spectra of Fe<sup>3+</sup>, PMS, oxalate, Fe<sup>3+</sup>-oxalate complexes and Orange II ([Fe<sup>3+</sup>] = 100 μM, [Orange II] = 50 μM, [PMS] = 150 μM, [oxalate] = 80 μM).

**Figure S2:** The comparison of UVA-Fe<sup>3+</sup>-PMS-oxalate system and Fe<sup>3+</sup>-PMS-oxalate system ([Fe<sup>3+</sup>]<sub>0</sub> = 100 μM [Orange II]<sub>0</sub> = 50 μM, [PMS]<sub>0</sub> = 150 μM, [oxalate]<sub>0</sub> = 80 μM).

**Figure S3:** The effect of light wavelength on the decolorization of Orange II ([Fe<sup>3+</sup>]<sub>0</sub> = 100 μM, [Orange II]<sub>0</sub> = 50 μM, [PMS]<sub>0</sub> = 150 μM, [oxalate]<sub>0</sub> = 80 μM).

**Table S1.** Fe<sup>2+</sup> production in the UVA-Fe<sup>3+</sup>-PMS-oxalate system at pH 3.0 at different time ([Fe<sup>3+</sup>]<sub>0</sub> = 100 μM, [PMS]<sub>0</sub> = 150 μM, [oxalate]<sub>0</sub> = 80 μM, [under UVA irradiation](#), λ<sub>irr.</sub> = 365 nm).

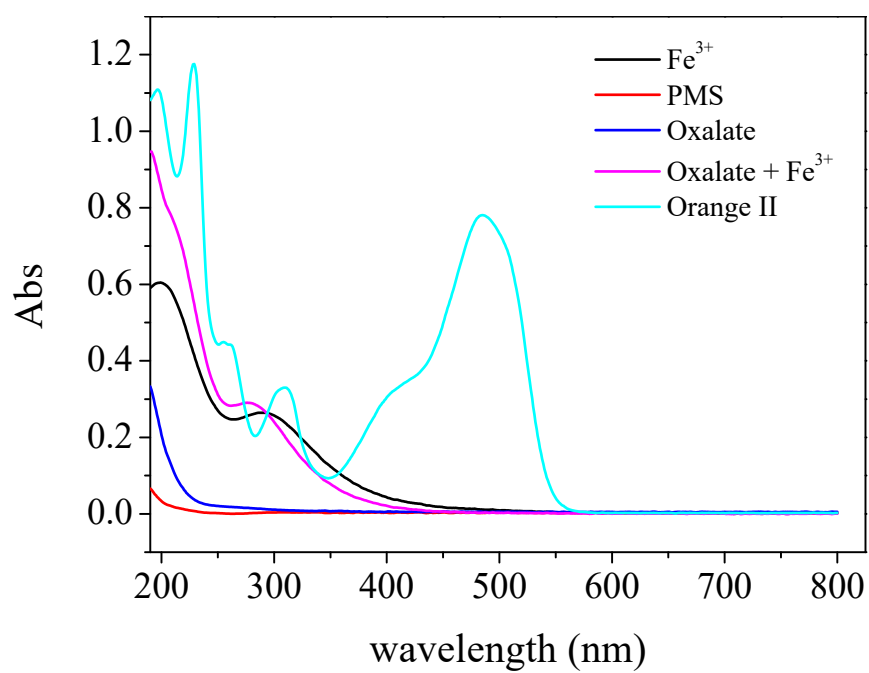

Figure S1

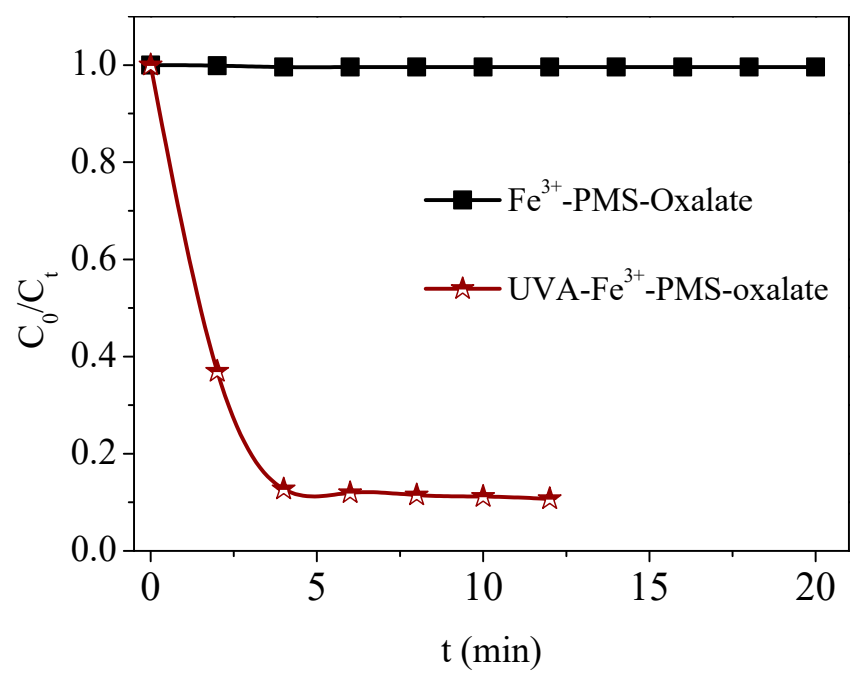

Figure S2

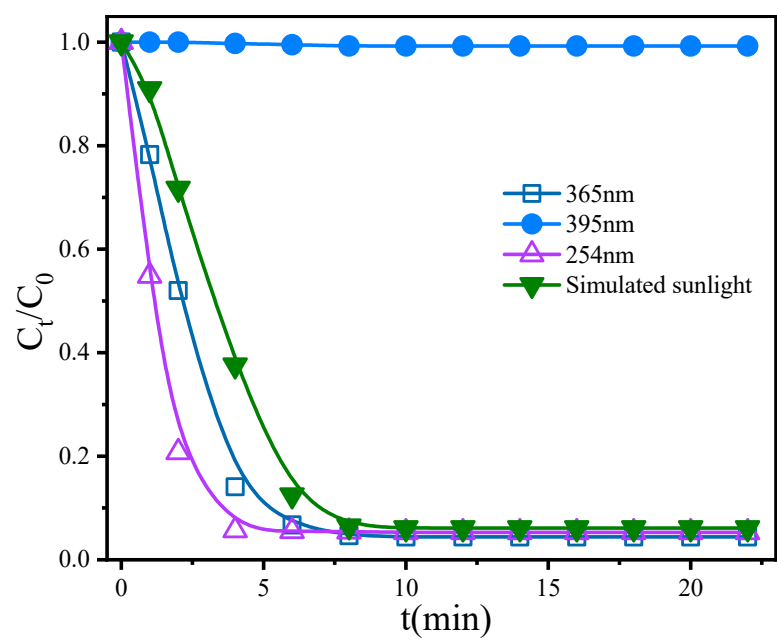

Figure S3

**Table S1**

| <b>Time (min)</b> | <b>Production of Fe<sup>2+</sup> (μM)</b> |
|-------------------|-------------------------------------------|
| 0                 | 0                                         |
| 1                 | 1.01                                      |
| 4                 | 4.34                                      |
| 6                 | 22.56                                     |
| 8                 | 35.02                                     |
| 10                | 42..42                                    |
